# Supplementary material for: A 2D porous Fe2O3/graphitic-C3N4/graphene ternary nanocomposite with multifunctions of catalytic hydrogenation, chromium(vi) adsorption and detoxification
Source: Royal Society of Chemistry journal article supplement (doi:10.1039/c6ta09774j), 2017-01-01
Supplement: c6ta09774j1.pdf [file c6ta09774j1.pdf]

**2D porous Fe<sub>2</sub>O<sub>3</sub>/graphitic-C<sub>3</sub>N<sub>4</sub>/graphene ternary  
nanocomposite with multifunctions of catalytic  
hydrogenation, chromium(VI) adsorption and detoxification**

Yu-Ting Zhuang, Ting-Ting Zhu, Man Ruan, Yong-Liang Yu\* and Jian-Hua Wang\*

*Research Center for Analytical Sciences, College of Sciences, Northeastern*

*University, Box 332, Shenyang 110819, China*

\*Corresponding author.

E-mail: yuy1@mail.neu.edu.cn (Y.-L. Yu), jianhuajrz@mail.neu.edu.cn (J.-H. Wang).

Tel: +86 24 83688944; Fax: +86 24 83676698

Electronic Supplementary Information

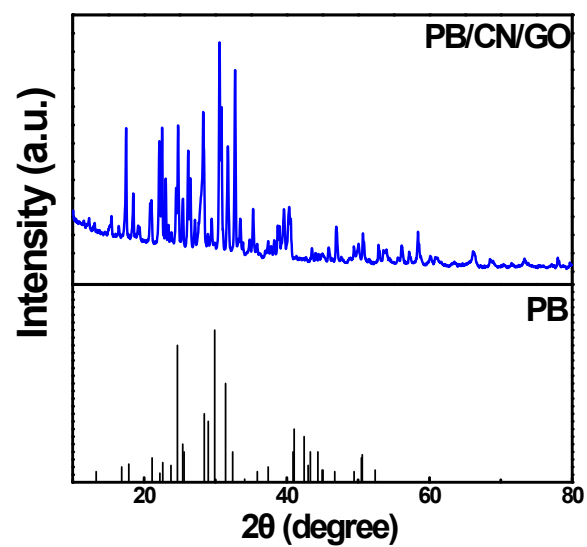

Fig. S1 XRD pattern of PB/urea/GO and Joint Committee on Powder  
Diffraction Standards (JCPDS) card for PB.

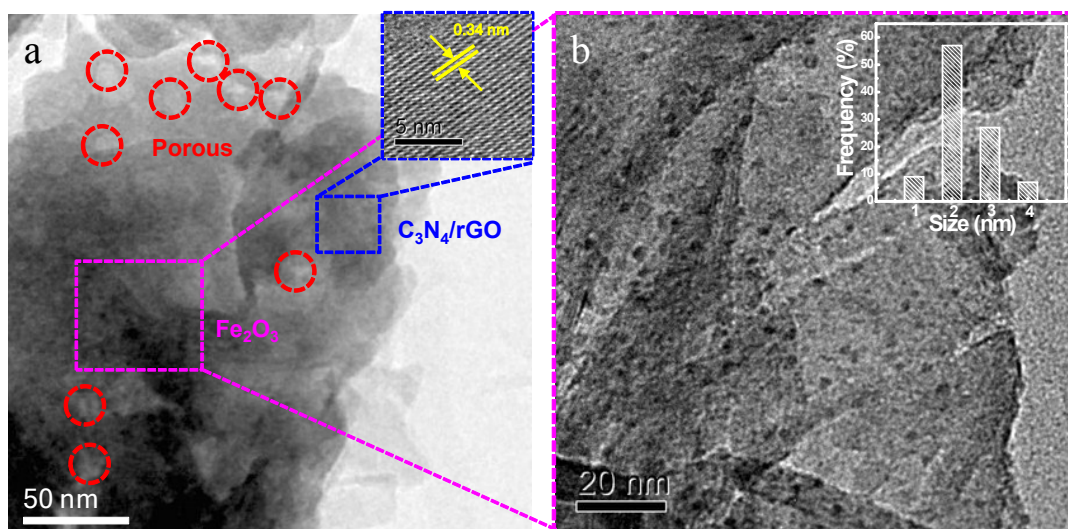

Fig. S2 (a) TEM image of FeCNG-127, inset: HRTEM image of FeCNG-127 from the area labelled by the rectangular frame in (a); (b) HRTEM image of FeCNG-127 from the area labelled by the rectangular frame in (a), inset: particle size distribution of Fe<sub>2</sub>O<sub>3</sub> particles in FeCNG-127.

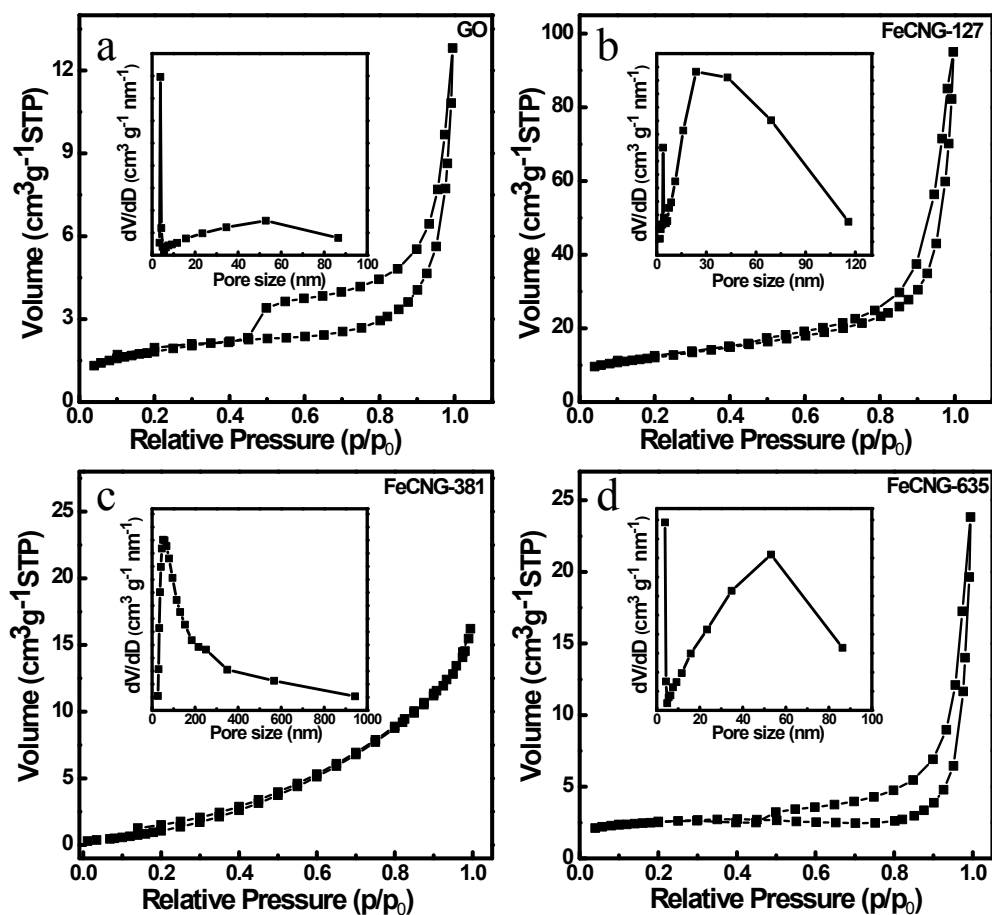

Fig. S3 Nitrogen adsorption/desorption isotherms and pore size distributions of (a) GO, (b) FeCNG-127, (c) FeCNG-381 and (d) FeCNG-635.

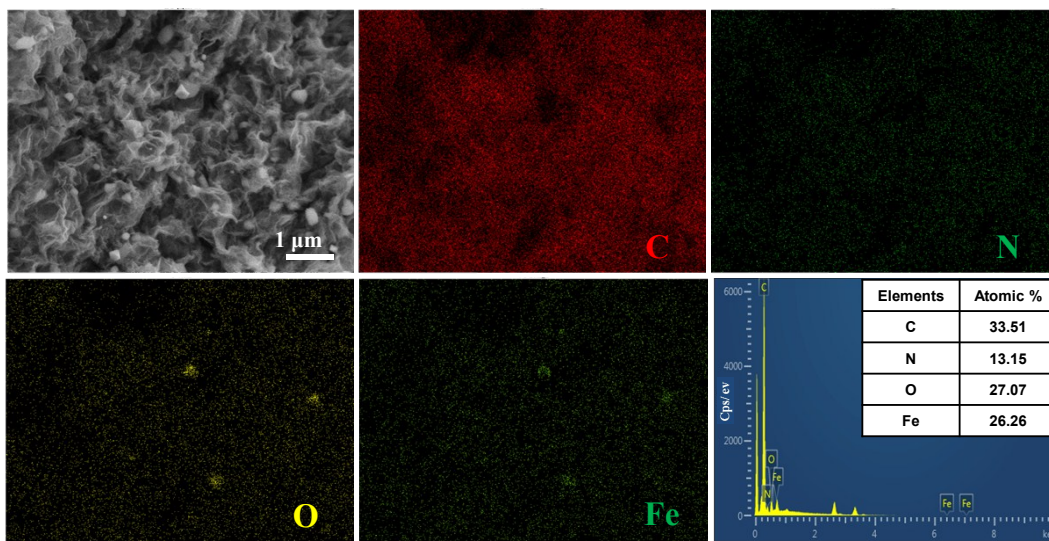

Fig. S4 Element mapping images and EDS analysis of FeCNG-127.

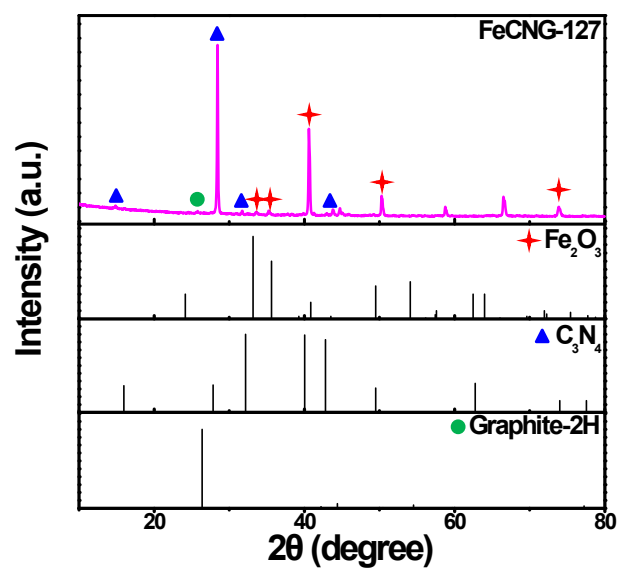

Fig. S5 XRD patterns of FeCNG-127 and JCPDS cards for Fe<sub>2</sub>O<sub>3</sub>, C<sub>3</sub>N<sub>4</sub> and Graphite-2H.

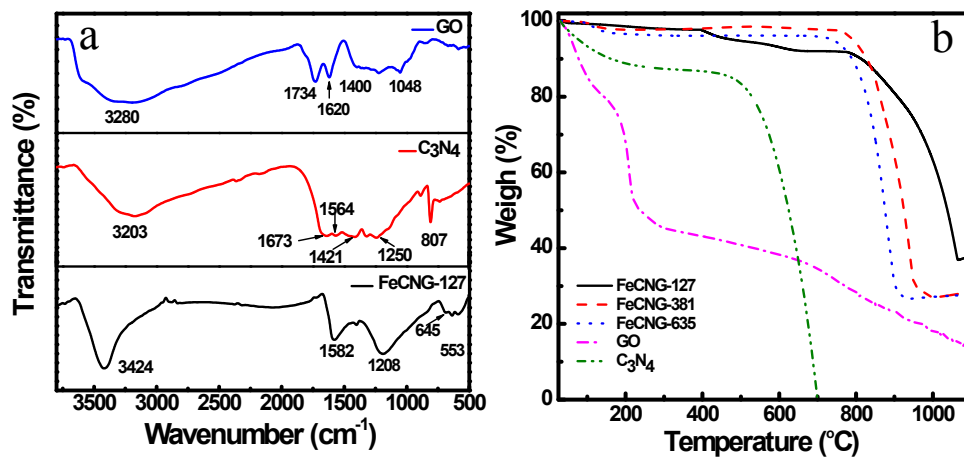

Fig. S6 (a) FT-IR spectra of GO, C<sub>3</sub>N<sub>4</sub> and FeCNG-127; (b) TGA curves of GO, C<sub>3</sub>N<sub>4</sub>, FeCNG-127, FeCNG-381 and FeCNG-635 in N<sub>2</sub> atmosphere.

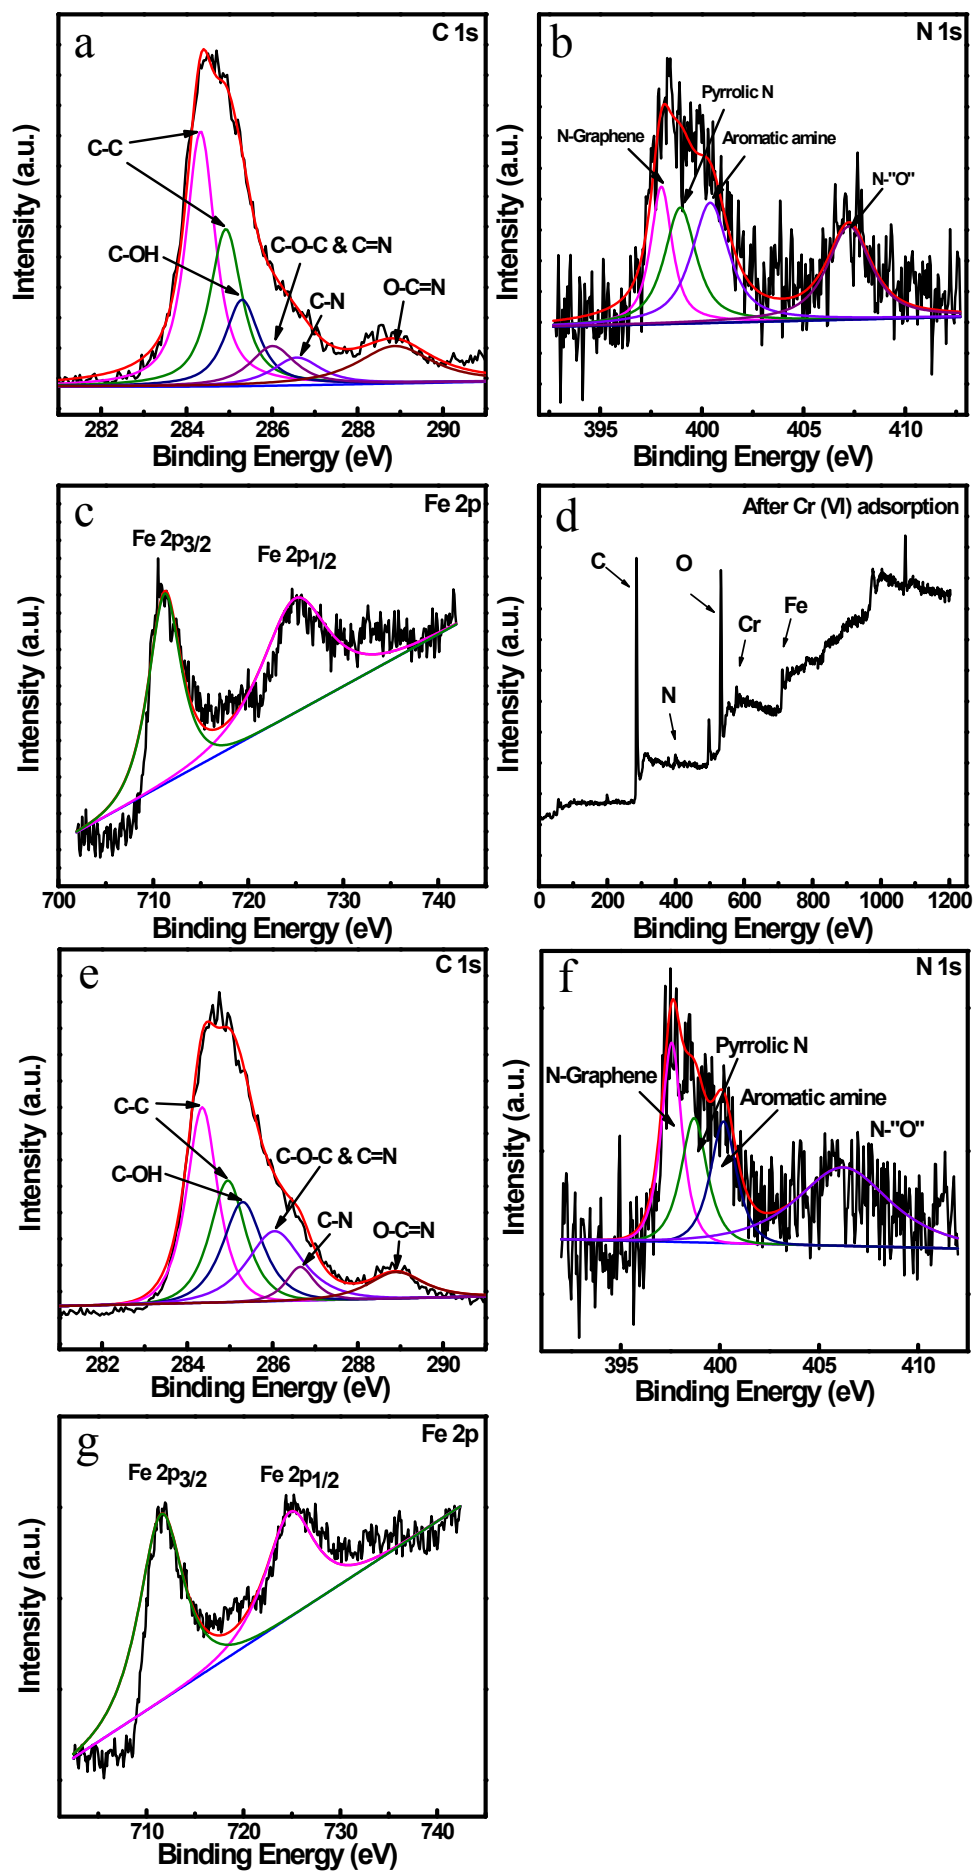



Fig. S7 (a) C 1s spectrum of FeCNG-127 before Cr(VI) adsorption; (b) N 1s spectrum of FeCNG-127 before Cr(VI) adsorption; (c) Fe 2p spectrum of FeCNG-127 before Cr(VI) adsorption; (d) XPS survey spectrum of FeCNG-127 after Cr(VI) adsorption; (e) C 1s spectrum of FeCNG-127 after Cr(VI) adsorption; (f) N 1s spectrum of FeCNG-127 after Cr(VI) adsorption; (g) Fe 2p spectrum of FeCNG-127 after Cr(VI) adsorption.

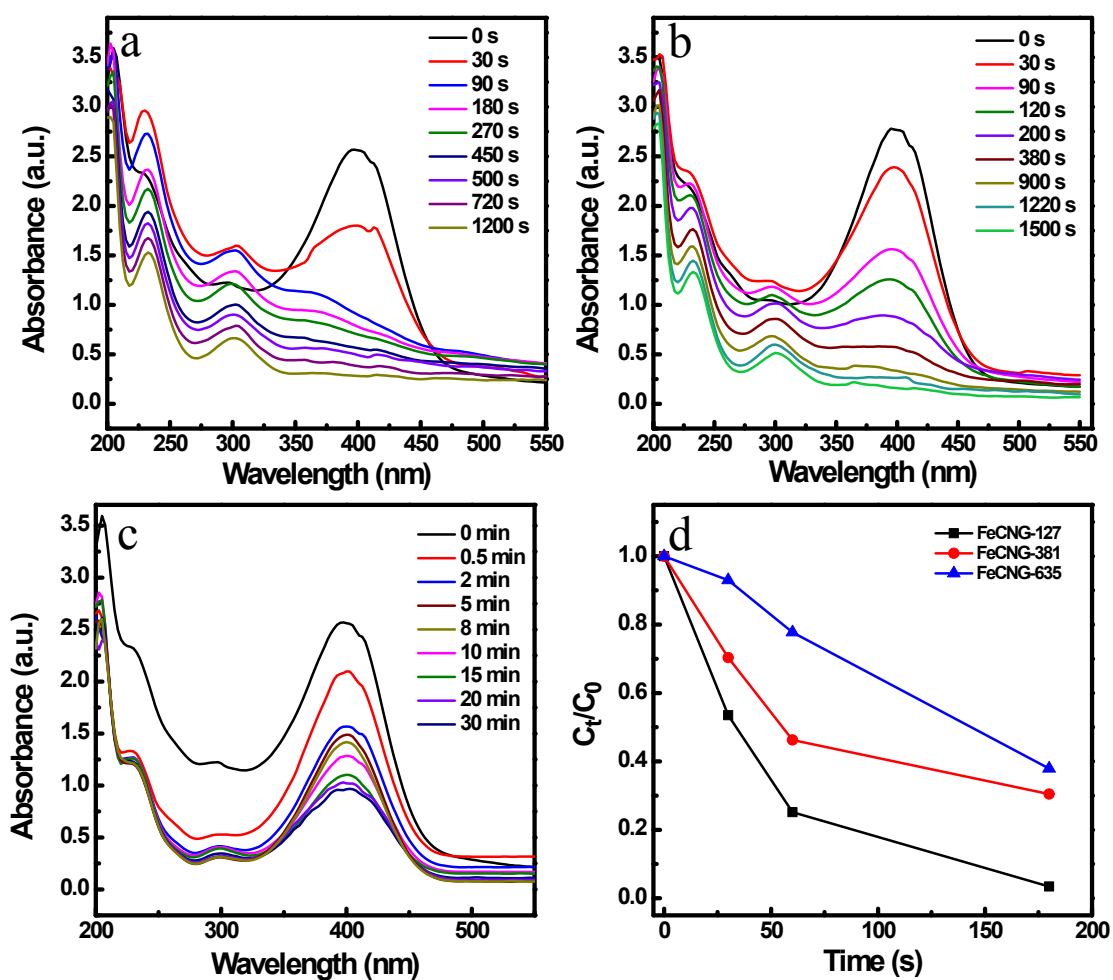

Fig. S8 (a) Time-dependent absorption spectra for the catalytic reduction of 4-NP by NaBH<sub>4</sub> in the presence of 1 mg of different catalysts: (a) FeCNG-381, (b) FeCNG-635 and (c) rGO-127; (d) Adsorption rate of the catalytic reduction of 4-NP by NaBH<sub>4</sub> in the presence of 1 mg of different catalysts. Conditions: 4-NP: 0.005M; NaBH<sub>4</sub>: 0.02M; 25°C.

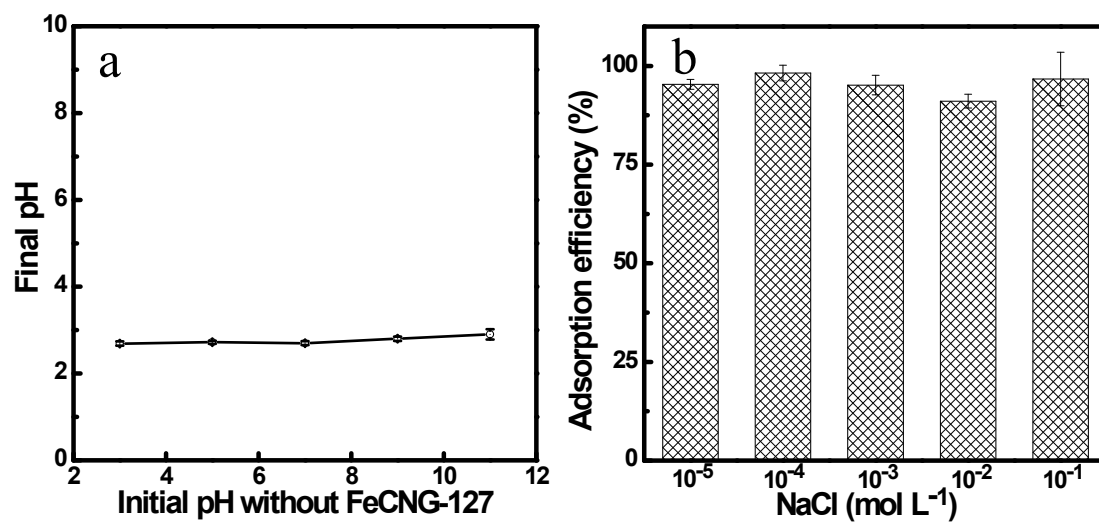

Fig. S9 (a) Variation of the final pH after immersion of FeCNG-127 into aqueous solutions with different pH values; (b) Effect of NaCl on the adsorption of Cr(VI) by FeCNG-127. Conditions: adsorbent dosage: 0.5 g L<sup>-1</sup>; Cr(VI) concentration: 5 mg L<sup>-1</sup>; shaking speed: 70 rpm; contact time: 6 h.

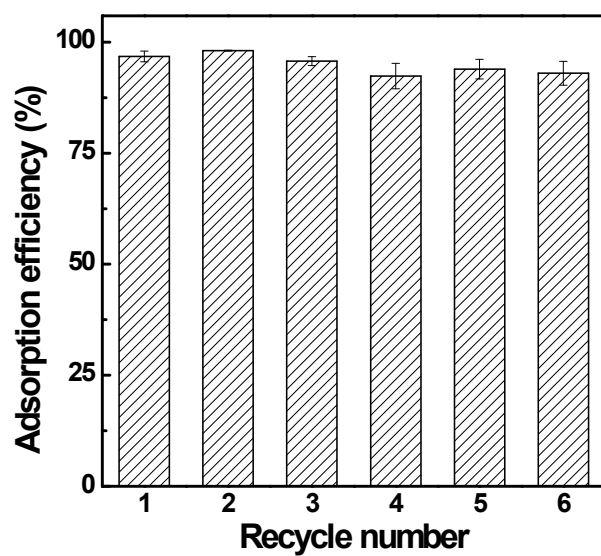

Fig. S10 Effect of recycling number on the adsorption of Cr(VI) by FeCNG-127. Conditions: adsorbent dosage:  $0.5 \text{ g L}^{-1}$ ; Cr(VI) concentration:  $5 \text{ mg L}^{-1}$ ; shaking speed: 70 rpm; contact time: 6 h.

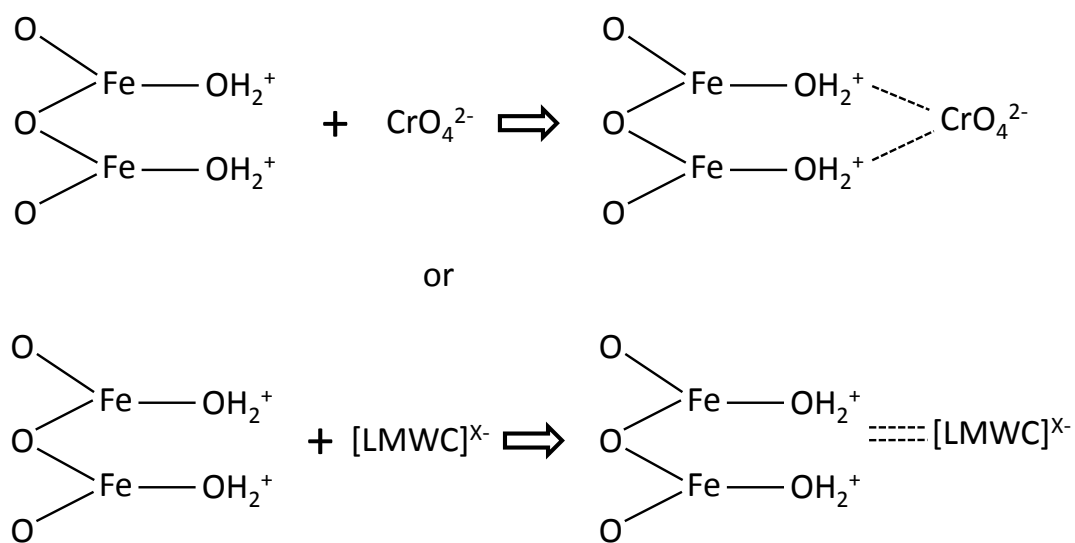

Scheme S1 Speculated mechanisms for the adsorption of Cr(VI) by FeCNG.

Table S1 Comparison of catalytic performance of recently reported catalysts towards *p*-nitrophenol reduction.

| Catalyst                                                           | Dosage (mg) | k (min <sup>-1</sup> ) | Ref.      |
|--------------------------------------------------------------------|-------------|------------------------|-----------|
| Co <sub>0.85</sub> Se-Fe <sub>3</sub> O <sub>4</sub> nanocomposite | 1           | 0.393                  | [1]       |
| Ni/graphene nanostructure                                          | 3           | 0.702                  | [2]       |
| Nickel/nanoporous carbon composite                                 | 0.3         | 0.168                  | [3]       |
| NiCo <sub>2</sub> alloy                                            | 1           | 0.0735                 | [4]       |
| Alloyed Cu/Ag bimetallic nanoparticles                             | 2           | 0.237                  | [5]       |
| Au-Fe <sub>3</sub> O <sub>4</sub> hybrid nanoparticles             | 1           | 0.629                  | [6]       |
| FeCNG-127                                                          | 1           | 1.11                   | This work |

Table S2 Adsorption kinetics fitting results for Cr(VI) adsorption on FeCNG-127 by pseudo-first-order and pseudo-second-order.

| Pseudo-first-order model    |                            |        | Pseudo-second-order model   |                                   |        |
|-----------------------------|----------------------------|--------|-----------------------------|-----------------------------------|--------|
| $Q_e$ (mg g <sup>-1</sup> ) | $k_1$ (min <sup>-1</sup> ) | $R^2$  | $Q_e$ (mg g <sup>-1</sup> ) | $k_2$ [g (mg min) <sup>-1</sup> ] | $R^2$  |
| 3.03                        | 0.00516                    | 0.8548 | 10.2                        | 0.00926                           | 0.9993 |

## References

- 1 J. M. Song, S. S. Zhang and S. H. Yu, *Small*, 2014, **10**, 717-724.
- 2 Y. G. Wu, M. Wen, Q. S. Wu and H. Fang, *J. Phys. Chem. C*, 2014, **118**, 6307-6313.
- 3 Y. Yang, Y. Zhang, C. J. Sun, X. Li, W. Zhang, X. Ma, Y. Ren and X. Zhang, *ChemCatChem*, 2014, **6**, 3084-3090.
- 4 K. L. Wu, X. W. Wei, X. M. Zhou, D. H. Wu, X. W. Liu, Y. Ye and Q. Wang, *J. Phys. Chem. C*, 2011, **115**, 16268-16274.
- 5 W. Wu, M. Lei, S. Yang, L. Zhou, L. Liu, X. Xiao, C. Jiang and V. A. L. Roy, *J. Mater. Chem. A*, 2015, **3**, 3450-3455.
- 6 X. W. Meng, B. Li, X. L. Ren, L. F. Tan, Z. B. Huang and F. Q. Tang, *J. Mater. Chem. A*, 2013, **1**, 10513-10517.
